# Supplementary material for: Glucagon-like peptide-2 receptor is a receptor for tick-borne encephalitis virus to infect nerve cells
Source: Research Square preprint supplement (doi:10.21203/rs.3.rs-127347/v1), 2021-02-05
Supplement: Supplementary file 1 [file 0ce3f8fb902d7643e096b109.docx]

**Table 1. Primers used to amplify the GLP2R, envelope and its mutants**

| **Primer** | **Ori** | **Sp** | **Seq (5’-3’)** |
| --- | --- | --- | --- |
| GLP2R-HA | F | Human | CCG*CTCGAG*ATGAAGCTGGGATCGAGCAGGGCA |
| GLP2R-HA | R | Human | CCG*GAATTC*CTAAGCGTAGTCTGGGACGTCGTATGGGTAGATCTCACTCTCTTCCAG |
| GLP2R-egfp | F | Human | CCG*CTCGAG*ATGAAGCTGGGATCGAGCAGGGCA |
| GLP2R-egfp | R | Human | CCG*GAATTC*TTACTTGTACAGCTCGTCCATGCCG |
| GLP2R-egfp | OCF | Human | TGGAAGAGAGTGAGATCGGAGGTGGAGTGAGCAAGGGCGAGGAGCTGTTC |
| GLP2R-egfp | OCR | Human | GAACAGCTCCTCGCCCTTGCTCACTCCACCTCCGATCTCACTCTCTTCCA |
| GLP2R-egfp(239GSG247) | F | Human | CCG*CTCGAG*ATGAAGCTGGGATCGAGCAGGGCA |
| GLP2R-egfp(239GSG247) | R | Human | CCG*GAATTC*TTACTTGTACAGCTCGTCCATGCCG |
| GLP2R-egfp(239GSG247) | OCF | Human | ACGTCGTCTTCTACAACTCTGGATCAGGAGGGTGGATGTCCTACCTGTCAG |
| GLP2R-egfp(239GSG247) | OCR | Human | CAGGTAGGACATCCACCCTCCTGATCCAGAGTTGTAGAAGACGACGTCCTT |
| GLP2R-egfp(239GSG251) | F | Human | CCG*CTCGAG*ATGAAGCTGGGATCGAGCAGGGCA |
| GLP2R-egfp(239GSG251) | R | Human | CCG*GAATTC*TTACTTGTACAGCTCGTCCATGCCG |
| GLP2R-egfp(239GSG251) | OCF | Human | ACGTCGTCTTCTACAACTCTGGATCAGGATACCTGTCAGAGATGTCCACCT |
| GLP2R-egfp(239GSG251) | OCR | Human | GGACATCTCTGACAGGTATCCTGATCCAGAGTTGTAGAAGACGACGTCCTT |
| GLP2R-egfp(239GSG254) | F | Human | CCG*CTCGAG*ATGAAGCTGGGATCGAGCAGGGCA |
| GLP2R-egfp(239GSG254) | R | Human | CCG*GAATTC*TTACTTGTACAGCTCGTCCATGCCG |
| GLP2R-egfp(239GSG254) | OCF | Human | ACGTCGTCTTCTACAACTCTGGATCAGGAGAGATGTCCACCTCCTGCCGCT |
| GLP2R-egfp(239GSG254) | OCR | Human | GCAGGAGGTGGACATCTCTCCTGATCCAGAGTTGTAGAAGACGACGTCCTT |
| 176-553-HA(△ECD) | F | Human | CCG*CTCGAG*ATGTCAACCTTGCAGCTGATGTAC |
| 176-553-HA(△ECD) | R | Human | CCGGAATTCCTAAGCGTAGTCTGGGACGTCGTATGGGTAGATCTCACTCTCTTCCAG |
| 215-553-HA(ECL1/2/3) | F | Human | CCG*CTCGAG*ATGAACTTGTTTGCTTCTTTCATC |
| 215-553-HA(ECL1/2/3) | R | Human | CCG*GAATTC*CTAAGCGTAGTCTGGGACGTCGTATGGGTAGATCTCACTCTCTTCCAG |
| 303-553-HA(ECL2/3) | F | Human | CCG*CTCGAG*ATGTACCTGCTGTTGGGTTGGGCCTTC |
| 303-553-HA(ECL2/3) | R | Human | CCG*GAATTC*CTAAGCGTAGTCTGGGACGTCGTATGGGTAGATCTCACTCTCTTCCAG |
| 384-553-HA(ECL3) | F | Human | CCG*CTCGAG*ATGGCAAAATCAACACTGGTC |
| 384-553-HA(ECL3) | R | Human | CCG*GAATTC*CTAAGCGTAGTCTGGGACGTCGTATGGGTAGATCTCACTCTCTTCCAG |
| 1-180-egfp(ECD) | F | Human | CCG*CTCGAG*ATGAAGCTGGGATCGAGCAGGGCA |
| 1-180-egfp(ECD) | R | Human | CCTTGCTCACTCCACCTCCCAGCTGCAAGGTTGACAGCAAGGC |
| 1-180-egfp(ECD) | OCF | Human | CTTGCTGTCAACCTTGCAGCTGGGAGGTGGAGTGAGCAAGGGCGAG |
| 1-180-egfp(ECD) | OCR | Human | CCG*GAATTC*TTACTTGTACAGCTCGTCCATGCCG |
| GLP2R-egfp | F | Mouse | CCG*CTCGAG*ATGCGTCGGCTCTGGGGCCCTGGGAC |
| GLP2R-egfp | R | Mouse | CCG*GAATTC*TTACTTGTACAGCTCGTCCATGCCG |
| GLP2R-egfp | OCF | Mouse | ATTCTGGAAGAGAGTGAGATCGGAGGTGGAGTGAGCAAGGGCGAGGAGCT |
| GLP2R-egfp | OCR | Mouse | AGCTCCTCGCCCTTGCTCACTCCACCTCCGATCTCACTCTCTTCCAGAAT |
| Flag-E | F | TBEV | CCC*AAGCTT*ATGTCACGATGCACACATTTGG |
| Flag-E | R | TBEV | GG*GGTACC*TTAAGCTCCGACTCCGAGTGTCATG |
| Flag-137-496(△1-136) | F | TBEV | CCC*AAGCTT*ATGATTGTGTACACGGTTAAAGTAGAGC |
| Flag-137-496(△1-136) | R | TBEV | GG*GGTACC*TTAAGCTCCGACTCCGAGTGTCATG |
| Flag-303-496(△1-302) | F | TBEV | CCC*AAGCTT*ATGACATACACAATGTGCGACAAGACG |
| Flag-303-496(△1-302) | R | TBEV | GG*GGTACC*TTAAGCTCCGACTCCGAGTGTCATG |
| Flag-303-395-Flag(D III) | F | TBEV | CCC*AAGCTT*ATGCTCACATACACAATGTGCG |
| Flag-303-395-Flag(D III) | R | TBEV | GG*GGTACC*TTACTTATCGTCGTCATCCTTGTAATCTTGGAACCATTGGTGACTCAG |

Ori: orientation, Sp: Species, F: forward primer, R: reverse primer, OCF: overlapping complementation forward primer, OCR: overlapping complementation reverse primers. The sequence of restriction endonuclease sites is in italics.

**Table 2. The siRNA sequences used in RNA interference (RNAi)**

| **Gene** | **Species** | **Sequence ( F/R, 5’-3’)** |
| --- | --- | --- |
| *glp2r* (361) | Human | GGAAGUGGGCUCAGUACAATT/UUGUACUGAGCCCACUUCCTT |
| *glp2r* (616) | Human | GCUCCGAGAACCACAGCUUTT/AAGCUGUGGUUCUCGGAGCTT |
| *glp2r* (1162) | Human | GGAUCAUCCGAGGACCCAUTT/AUGGGUCCUCGGAUGAUCCTT |
| *glp2r* (1888) | Monkey | GGAUCAUCCGAGGACCCAUTT/AUGGGUCCUCGGAUGAUCCTT |
| *glp2r* (174) | Hamster | GGUUUCCAUCAAGCAAGUUTT/AACUUGCUUGAUGGAAACCTT |
| *glp2r* (1302) | Hamster | GCAGUAUGGCUUUGCCAAUTT/AUUGGCAAAGCCAUACUGCTT |

**Table 3. CRISPR/Cas9-mediated knockout guide sequences**

| **Gene** | **Guide RNA** | **Sequence (5’-3’)** |
| --- | --- | --- |
| *glp2r* | gRNA-4 | CCCTCCTTGAGGAAACGACT/AGTCGTTTCCTCAAGGAGGG |
| *glp2r* | gRNA-7 | AAGGGCCTACAGACACTGCT/AGCAGTGTCTGTAGGCCCTT |
| *glp2r* | gRNA-8 | GCAGACGATAGAGAACGCCA/TGGCGTTCTCTATCGTCTGC |
| *glp2r* | gRNA-9 | GGCGTCCACGAGCTGCCCAT/ATGGGCAGCTCGTGGACGCC |

**Table 4. qRT-PCR primers for gene expression detection and quantification**

| **Gene** | **Species** | **Sequence (F/R, 5’-3’)** |
| --- | --- | --- |
| *glp2r* | Human | TCCTGGAAATGTCTCTGTACCC/GGCGTTCTCTATCGTCTGCC |
| *glp2r* | Human | GGAAGTGGGCTCAGTACAAAC/GTCCCGTTACAAAATATGCCAGA |
| *glp2r* | Mouse | AGGAGACAGTTCAGAAGTGGG/GCCAGCACACGTACTTATCAA |
| *glp2r* | Monkey | GATCATTATGCCTTGCTGTCAACCTTG/GAGGAGGGTGAGAGCCAGGAAG |
| *glp2r* | Hamster | GTTCCCTGCCCTTCATACTTACCTTG/GGTTCTCTGAGCATTCTGAGTCATCC |
| WH2012 | TBEV-FE | CACAACCTGGAGTGCTCG/ACCATGTTCGGCCTTATC |
| Neudoerfl | TBEV-Eu | GCAGCCAGATGCCCAACAATGG/TCTTTTTTGCCTCACAAGCCGCCT |
| JEV | JEV | TACAACATGATGGGAAAGCGAGAGAAAAA/GTGTCCCAGCCGGCGGTGTCATCAGC |
| VSV | VSV | CAAGTCAAAATGCCCAAGAGTCACA/TTTCCTTGCATTGTTCTACAGATGG |
| ZIKV | ZIKV | ACCATACGGCCAACAAAGAG/TCCACAGCCAGGAAGAGACT |
| *β-actin* | Human | CTCGACACCAGGGCGTTATG/CCACTCCATGCTCGATAGGAT |
| *β-actin* | Mouse | AGTGTGACGTTGACATCCGT/GCAGCTCAGTAACAGTCCGC |
| *β-actin* | Monkey | GCCGGGACCTGACTGACTACC/CTTCTCCTTAATGTCACGCACGATTTC |
| *β-actin* | Hamster | GTACCACTGGCATTGTGATGGACTC/TGGCATGAGGGAGAGCGTAGC |

**Table 5. PCR primers for genotyping of wild type, heterozygote or homozygote mice**

| **Gene** | **Species** | **Sequence (F/R, 5’-3’)** |
| --- | --- | --- |
| *glp2r* | Mouse | CTGGCTAGAGACACACTGCTTATC/CCAACACCTCTTCATAAGGGCC |
| *glp2r* | Mouse | AATGCAAGGGCTTCAACCTTG/ATTAGCACTCACCTCTGGACTGC |

**Table 6. List of primary antibodies, secondary antibodies and molecular**

**probes used in this study**

| **Antibody** | **Company** | **Catalogue number** |
| --- | --- | --- |
| Flag epitope | Cell Signalling Technology | 2368 |
| Flag epitope | Sigma Aldrich | F1804 |
| HA epitope | Cell Signalling Technology | 3724 |
| HA epitope | Sigma Aldrich | H9658 |
| GFP | Invitrogen | MA5-15256 |
| β-actin | Proteintech | 66009-1-Ig |
| GLP2R | Abcam | ab181030 |
| GLP2R | Abcam | ab188595 |
| NS1 | Production in this study | N/A |
| A4 | From F. X. Heinz | N/A |
| Goat anti–rabbit IgG-HRP | Jackson | 111-035-003 |
| Goat anti–mouse IgG-HRP | Jackson | 115-035-146 |
| DAPI | Beyotime | C1002 |

**Table 7. List of peptides used for blocking or binding assays in this study**

| Name | Length | Purification | Sequence |
| --- | --- | --- | --- |
| H33D | 33 aa | 98.93% | HADGSFSDEMNTILDNLAARDFINWLIQTKITD |
| D31D | 31 aa | 98.09% | DGSFSDEMNTILDNLAARDFINWLIQTKITD |
| Y41L | 41 aa | 98.14% | YNSYSKRPDNENGWMSYLSEMSTSCRSVQVLLHYFVGANYL |
| G99I | 99 aa | >95% | GLTYTMCDKTKFTWKRIPTDSGHDTVVMEVAFSGTKPCRIPVRAVAHGSPDVNVAMLITPNPTIETNGGGFIEMQLPPGDNIIYVGELSHQWFQKGSSI |
| G99I-lys- biotin | 100 aa | >95% | GLTYTMCDKTKFTWKRIPTDSGHDTVVMEVAFSGTKPCRIPVRAVAHGSPDVNVAMLITPNPTIETNGGGFIEMQLPPGDNIIYVGELSHQWFQKGSSI-lys-biotin |
